# Supplementary material for: mTOR-regulated mitochondrial metabolism limits mycobacterium-induced cytotoxicity
Source: PubMed Central journal article supplement (PMC9596383; doi:10.1016/j.cell.2022.08.018), 2022-09-29
Supplement: mmc1.pdf [file mmc1.pdf]

**Cell, Volume 185**

**Supplemental information**

**mTOR-regulated mitochondrial metabolism**

**limits mycobacterium-induced cytotoxicity**

**Antonio J. Pagán, Lauren J. Lee, Joy Edwards-Hicks, Cecilia B. Moens, David M. Tobin, Elisabeth M. Busch-Nentwich, Erika L. Pearce, and Lalita Ramakrishnan**
